# Supplementary material for: Projected Outcomes of Optimized Statin and Ezetimibe Therapy in US Military Veterans with Coronary Artery Disease
Source: PubMed Central journal article supplement (PMC10463102; doi:10.1001/jamanetworkopen.2023.29066), 2023-08-28
Supplement: jamanetwopen-e2329066-s002.pdf [file jamanetwopen-e2329066-s002.pdf]

## Data Sharing Statement

Kovach. Projected Outcomes of Optimized Statin and Ezetimibe Therapy in US Military Veterans with Coronary Artery Disease. *JAMA Netw Open*. Published August 31, 2023. doi:10.1001/jamanetworkopen.2023.29066

### Data

**Data available:** No

### Additional Information

**Explanation for why data not available:** The data that support the findings of this study may be made available upon reasonable request, though they will be subject to the stringent data privacy rules of the VA Healthcare System and the United States Government.
